# Supplementary material for: Targeted design of a cubic boron imidazolate cage with sensing and reducing functions
Source: Royal Society of Chemistry journal article supplement (doi:10.1039/c5dt00639b), 2015-01-01
Supplement: c5dt00639b1.pdf [file c5dt00639b1.pdf]

## Supporting Information

### **Targeted Design of a Cubic Boron Imidazolate Cage with Sensing and Reducing Functions**

De-Xiang Zhang, Hai-Xia Zhang, Tian Wen\* and Jian Zhang\*

State Key Laboratory of Structural Chemistry, Fujian Institute of Research on the Structure of Matter,  
the Chinese Academy of Sciences, Fuzhou, Fujian 350002, P. R. China . E-mail: zhj@fjirsm.ac.cn,  
twen@fjirsm.ac.cn

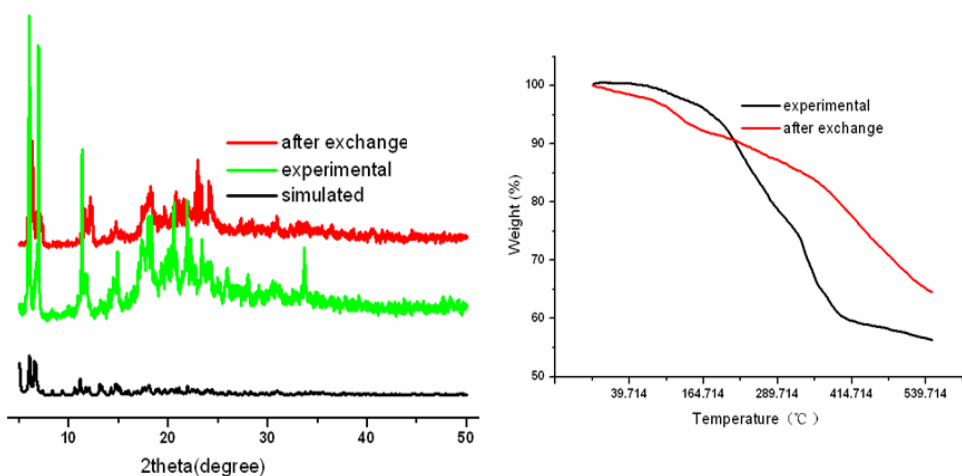

**Figure S1.** The PXR and TGA curve of **BIF-28**.

### Procedure for anion exchange

As-synthesized **BIF-28** (0.1 mmol) was immersed in an aqueous solution (4.5 mL) of  $K_2Cr_2O_7$  ( $0.00068 \text{ mol}\cdot\text{L}^{-1}$ ) at room temperature for 9h. The anion exchange process was monitored by liquid UV-vis spectroscopy based on typical absorption of  $Cr_2O_7^{2-}$  at 257 nm. The aqueous  $K_2Cr_2O_7$  solution was pipetted at different time interval to measure the UV-vis adsorption intensity. The anion exchange capacity of **BIF-28** were evaluated by measuring the decolorization rate of aqueous  $K_2Cr_2O_7$  solution, which was calculated by the following formula:

$$D = \frac{(C_0 - C_1)}{C_0} \times 100\% = \frac{(A_0 - A_1)}{A_0} \times 100\%$$

Where D is adsorption capacity,  $C_0$ ,  $A_0$  and  $C_1$ ,  $A_1$  are the concentration and absorbency of aqueous  $K_2Cr_2O_7$  solution at the peak of 257 nm in adsorption equilibrium before and after anion exchange, respectively. The adsorption intensity of solution decreases from 0.932 to 0.382 with continuous exchange in 3h, which means 55%  $Cr_2O_7^{2-}$  was exchanged into the cationic framework. After anion exchange, the crystals were filtered, rinsed with deionized water and dried in the air.

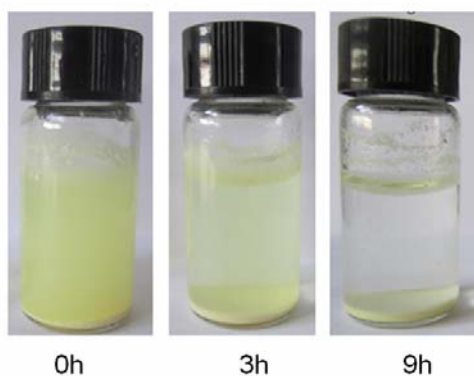

**Figure S2.** Photographs of the sample **BIF-28** show aqueous  $K_2Cr_2O_7$  solution changes with increasing exchange time at room temperature.

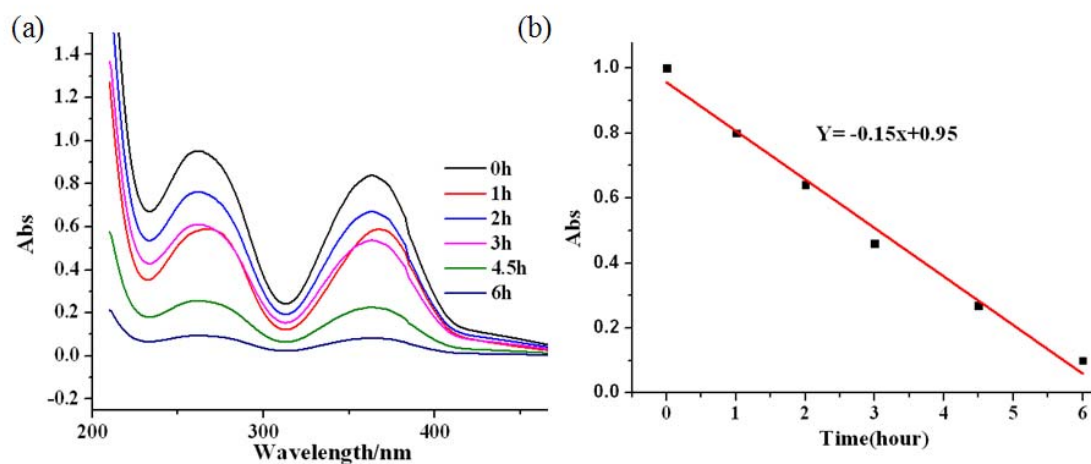

**Figure S3.** UV-vis spectra of aqueous  $K_2Cr_2O_7$  solution during anion exchange and fit curves of the exchange of  $Cr_2O_7^{2-}$  in the first 6 h.

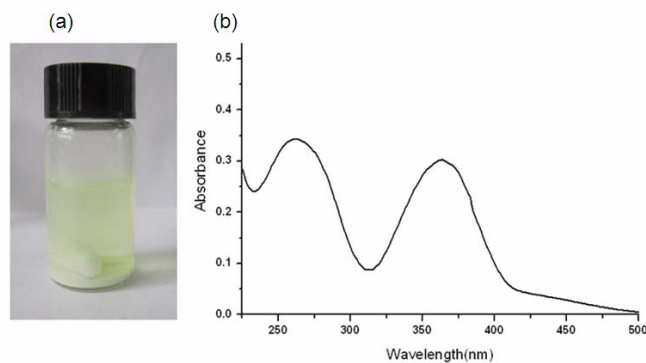

**Figure S4.** (a) Photographs of the regeneration of **BIF-28** from  $Cr_2O_7$  exchanged sample **BIF-28- $Cr_2O_7$**  in aqueous  $KNO_3$  solution. (b) UV-vis spectra of released  $Cr_2O_7^{2-}$  solution.

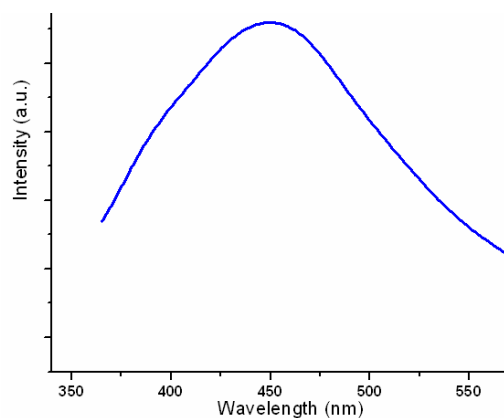

**Figure S5.** The solid-state emission spectra ( $\lambda_{ex} = 355$  nm) for the  $\text{KBH}(\text{dm-bim})_3$  sample.

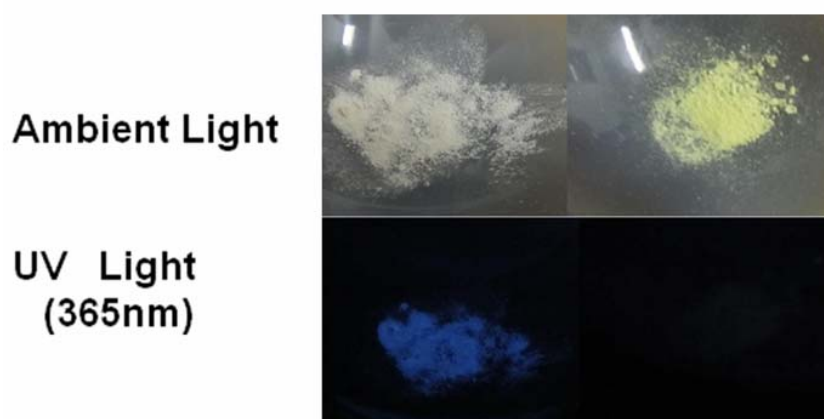

**Figure S6.** Photographs of the sample **BIF-28**: Showing luminescence changes with exchange time at room temperature under ambient light and 365 nm UV lamp, respectively.

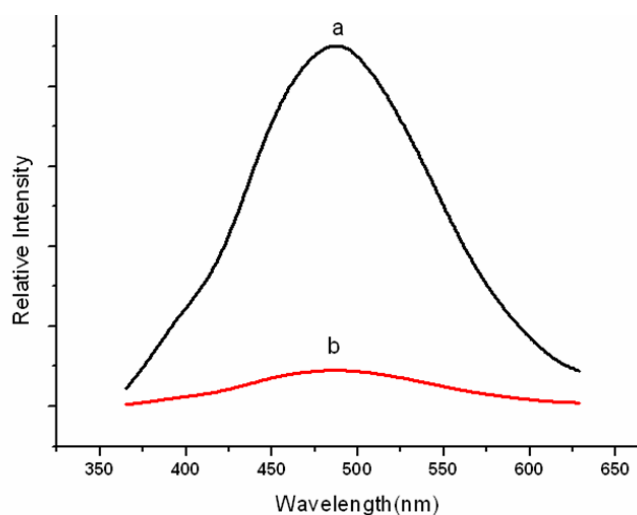

**Figure S7.** The solid-state emission spectra ( $\lambda_{ex} = 350$  nm) for the **BIF-28** sample (black line: before exchange  $\text{Cr}_2\text{O}_7^{2-}$ , red line: after exchange  $\text{Cr}_2\text{O}_7^{2-}$ ).

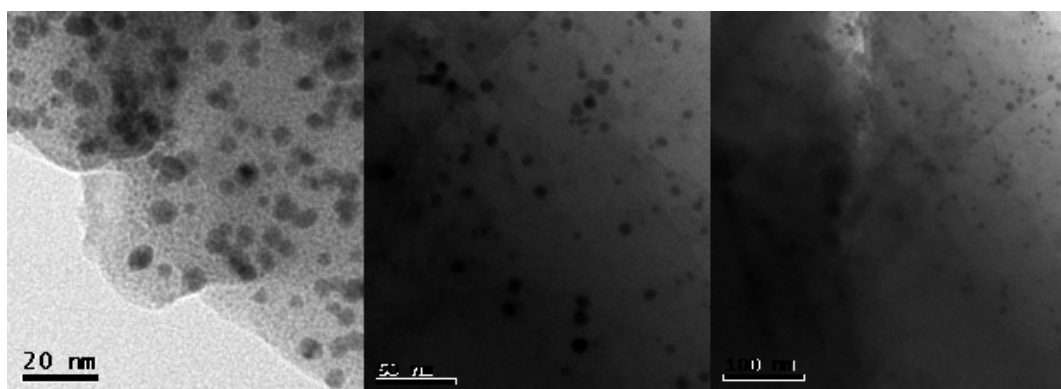

**Figure S8.** TEM images of the prepared Au@BIF-28 in water solution

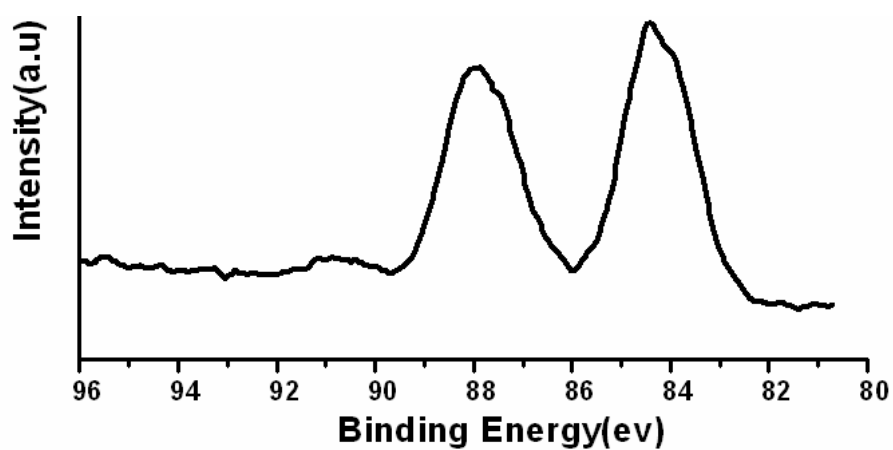

**Figure S9.** XPS spectrum of Au@BIF-28

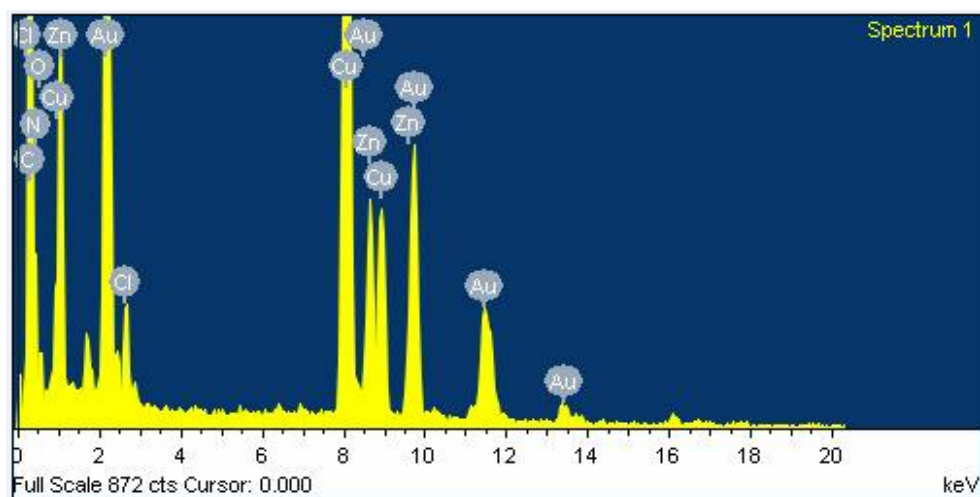

**Figure S10.** EDX spectrum of Au@BIF-28
